# Supplementary material for: Molecular Characterization of Sterol C4-Methyl Oxidase in Leishmania major
Source: Preprints.org preprint supplement (doi:10.20944/preprints202408.0195.v1), 2024-08-02
Supplement: Supplementary file 1 [file supplementary]

|                    |     |                                                      |     |
|--------------------|-----|------------------------------------------------------|-----|
| <i>L. major</i>    | 1   | MVFDTDFFVNVCSQMAANVLQSYIVAALHSAATQLPSSVQPYAMMLTRED   | 50  |
|                    |     | .  :     :     :     :                               |     |
| <i>L. donovani</i> | 1   | -----MAANALHSHIVAALHNAATKLPSSVQPYAMMLTRED            | 36  |
| <i>L. major</i>    | 51  | MVSTTLATAIATAVILYTVITVVLVPLRMDFYLSKLPTIKNSIPFLGHAL   | 100 |
|                    |     | :     :     :     :     :                            |     |
| <i>L. donovani</i> | 37  | MVSTTLATAIATAVILYTVITVVLVPLRMDFYLSKLPTIKNGIPFLGHAL   | 86  |
| <i>L. major</i>    | 101 | LLAGPSPWSKMSNNSLYPEKNLPQKKKSVDGPQTSRLVTYNVAGHRVIYI   | 150 |
|                    |     | :     :     :     :     :                            |     |
| <i>L. donovani</i> | 87  | LLAGPSPWSKMSNNSLYPEKNLPQKKKSADGPQTSRLVTYNVAGHRVIYI   | 136 |
| <i>L. major</i>    | 151 | NEPRLLRRVLLTHQRNYRKALAAAYKHFMCLLGTGLVTSEDEQWKKGRLL   | 200 |
|                    |     | :     :     :     :     :                            |     |
| <i>L. donovani</i> | 137 | NEPRLLRRVLLTHQRNYRKALAAAYKHFMCLLGTGLVTSEDEQWKKGRLL   | 186 |
| <i>L. major</i>    | 201 | LSHAMRIDILDSVPEMAMKAVDRILLKLDVDAKNPSVDLNEEYRHMTLQ    | 250 |
|                    |     | :     :     :     :     :                            |     |
| <i>L. donovani</i> | 187 | LSHAMRIDILDSVPEMAMKAVDRILLKLDVDAKNPSVDLNEEYRHMTLQ    | 236 |
| <i>L. major</i>    | 251 | VISESALSLSAEESDRIFPALYLPVHECNKRVWAPWRAYMPFLHGSRRMR   | 300 |
|                    |     | :     :     :     :     :                            |     |
| <i>L. donovani</i> | 237 | VISESALSLSAEESDRIFPALYLPVHECNKRVWAPWRAYMPFLQGSRRVR   | 286 |
| <i>L. major</i>    | 301 | NRCLSELNKLVRDIICRRWEQRNDSNYTAKPDILALCISQIDRIDEKMIV   | 350 |
|                    |     | .     :     :     :     :     :                      |     |
| <i>L. donovani</i> | 287 | NHCLSELNKLVRNIICRRWEQRNDSNCTGKPDILALCISQIDRMDEKMIV   | 336 |
| <i>L. major</i>    | 351 | GLIDDVKTIILAGHETSAALLTFATYEVLRHPEIRQKILEEATRLFDPAR   | 400 |
|                    |     | :     :     :     :     :                            |     |
| <i>L. donovani</i> | 337 | GLIDDVKTIILAGHETSAALLTFATYEVLRHPEIRQKILEEATRLFDPAR   | 386 |
| <i>L. major</i>    | 401 | CTCTVQTRYGPRGVPALNDVRSVLVWTPAVLRETLRRHSVWPLVMRYAAKD  | 450 |
|                    |     | .     :     :     :     :     :                      |     |
| <i>L. donovani</i> | 387 | CTRTVQTRYGPRGVPVNDVRDLVWTPAVLRETLRRHSVWPLVMRYAAKD    | 436 |
| <i>L. major</i>    | 451 | DVWPAADTGLDADVRIPAGCTIAVGIEGVHNNPDVWINKPEVFDPTRFIDA  | 500 |
|                    |     | :     :     :     :     :                            |     |
| <i>L. donovani</i> | 437 | DVWPAADTGLDADVRIPAGCTIAVGIEGVHNNPDVWINKPEVFDPTRFIDA  | 486 |
| <i>L. major</i>    | 501 | EIANDTNYLNQSTKDVKFAKKIDPYAFIPFINGPRNCLGQHLSMIETQVA   | 550 |
|                    |     | :     :     :     :     :                            |     |
| <i>L. donovani</i> | 487 | EIANDTNYLNQSTKDVKFAKKIDPYAFIPFINGPRNCLGQHLSMIETQVA   | 536 |
| <i>L. major</i>    | 551 | LAYHVLSDYDLTIYRDPSTYKGDVAAYEDAVGRHHDFIIPQVPHDGLKVNVT | 600 |
|                    |     | :     :     :     :     :                            |     |
| <i>L. donovani</i> | 537 | LAYHVLNYDLTIYRDPSTYKGDAAAYEDAVGRHHDFIIPQVPHDGLKVNVT  | 586 |
| <i>L. major</i>    | 601 | PNKLFM                                               | 606 |
|                    |     |                                                      |     |
| <i>L. donovani</i> | 587 | PNKLFM                                               | 592 |

**Figure S1. Pair-wise alignment of *L. major* CYP5122A (LmjF.27.0090) and *L. donovani* CYP5122A1 (LdBPK\_270090.1) using EMBOSS Needle. Identity: 94.4%. Similarity: 95.9%.**

|    |                                                                 |     |
|----|-----------------------------------------------------------------|-----|
| Lm | -----MV---LAKKQMKIPPIHKLRPGWSAVALHTVIYLLRHDF                    | 37  |
| At | -----                                                           | 0   |
| Sc | MSAVFNNATLSGLVQASTYSQTLQNVAHYQQLNFMKEYWAAWYSYM-----             | 47  |
| Mm | MA---TNK-SVGVS--SASLAVEYVDSLLPENPLQEPFKNAWVYML-----             | 41  |
| Lm | TAIVATSIVQPLYHRLILQNTYLQRLSDP--ALFTLVFAVLCHCVPWAFFNGIFLFFDSI    | 95  |
| At | -----MLLLPFMVN---TYFS---                                        | 13  |
| Sc | -----NNDV--LATGLMFLLHEFMYFFRCLPWFIIDQIPYFR-R-                   | 84  |
| Mm | -----DNYTKFQIATWGLIVHEAIFYLFLSLPGFLFQFIPYMR-K-                  | 80  |
|    | : * . :                                                         |     |
| Lm | HPQYGI EGLRNNALLAPLGRMAAYKLPRKPQQLPSAALIFSTMLHTAINHYLIIPVVLY    | 155 |
| At | -----FVPM--QTKNNTPAAQGKCITRLLLYHFSVNLPML                        | 47  |
| Sc | -----WKLQ--PTKIPSAKEQLYCLKSVLLSHFLVEAIPW                        | 118 |
| Mm | -----YKIQ--KDKPETFEGQWKCLKKILFNHFFIQLPLIC                       | 114 |
|    | : : : : : * : :                                                 |     |
| Lm | AYLVHTNSCALRAPPPESAIVGFAPEDVWNMMSGSNLRQIPISLVTITSHFLIANVINEM    | 215 |
| At | ASYPVFRA-----MG-----MRSSFP-LPSW-KEVSAQILFYFIIDF                 | 83  |
| Sc | TFHPMCEK-----LG-----ITVEVP-FPSL-KTMALEIGLFFVLEDT                | 154 |
| Mm | GTYYFTEF-----FN-----IPYDWERMPrWYLTAR-CLGCAVIEDT                 | 151 |
|    | . .. : * :: : :                                                 |     |
| Lm | GFYIVHSMHSSPTLYRVFHKHHMYTGTISIAAEYATPLEGILANAIPPTAYFTFMFFH      | 275 |
| At | VFYWGHRILHS-KWLYKNVHSVHHEYATPFGLTSEYAHPAEILFLGFATIVGPAL-----    | 137 |
| Sc | WHYWAHRLFHY-GVFYKYIHKQHRYAAPFGLSAEYAHPAETLSLGFGTVGMPILY--VM     | 211 |
| Mm | WHYFLHRLH-H-KRIYKYIHKVHHEFQAPFGIEAEYAHPLETLILGTGFFIGIVL-----    | 205 |
|    | . * * : * : * : * . * : : * * * * * : .                         |     |
| Lm | YTREEASKSSFVTSARAWPLFITWMWARLWETYEVS HSGYCFSDTWLGKLGLLHGHRRARFH | 335 |
| At | -----TGPHLITLWLMVLRVLETVEAHCGYHFPWSLSNFLPLYG--GADFH             | 182 |
| Sc | Y-----TGKLHLFTLCWITLRLFQAVDSHSGYDFPWSLNKIMPFWA--GAHH            | 258 |
| Mm | -----LCDHVILLWAWVTIRLLETIDVHSGYDIPLNPLNLVPFYT--GARHH            | 250 |
|    | : * : * : : * . * : : * *                                       |     |
| Lm | DFHHTHN--VCNYGSGL-FMDALLNTMDPYLIYRYPDKHPHTTALKEEDLKEPRDLEVG     | 391 |
| At | DYHHRLLYTKSGNYSSTFVYMDWIFGTDKGYRRL-----KTLKENG-----             | 223 |
| Sc | DLHHHYF--IGNYASSFRWWDYCLDTESGPEAK-----ASREERMKKRAEN--           | 302 |
| Mm | DFHHMNF--IGNYASTFTWWDKLFGTDAQYHAY-----IEKSKKLKGSKSD---          | 293 |
|    | * ** ** * : : * : *                                             |     |
| Lm | SEAMDQVRACS                                                     | 402 |
| At | --DMKQT----                                                     | 228 |
| Sc | -NAQKKTN---                                                     | 309 |
| Mm | -----                                                           | 293 |

**Figure S2. The alignment of ERG25 proteins (Lm: *L. major*; At: *Arabidopsis thaliana*; Sc: *Saccharomyces cerevisiae*; Mm: *Mus musculus*) using Clustal Omega. Asterisks (\*): fully conserved residues; colons (:): highly similar residues; periods (.): weakly similar residues. *L. major* ERG25 shows 23-25% identity to other ERG25s.**

**A**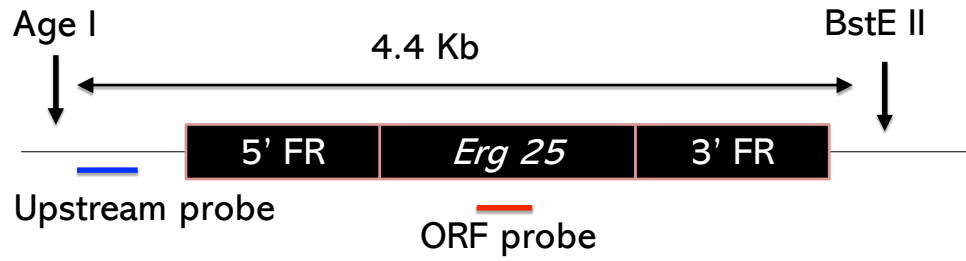**B**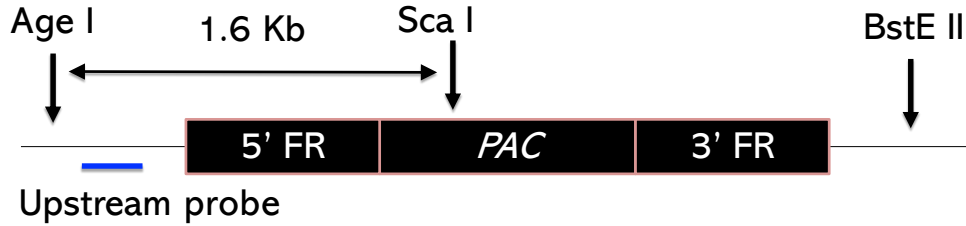**C**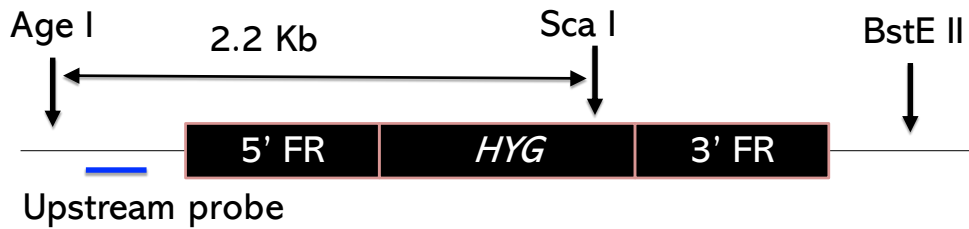

**Figure S3. Schematic depiction of the Southern blot for *L. major* *ERG 25*.** (A) The genomic locus of *ERG25* in WT *L. major* along with its open reading frame (ORF), 5' and 3' flanking regions (FR), recognition sites of Age I, BseE II and Sca I, and the positions of ORF probe and upstream probe. (B-C) Replacement of *ERG25* ORF with hygromycin (HYG) and puromycin (PAC) resistance genes. The expected sizes of DNA fragments recognized by the ORF probe or upstream probe were indicated.

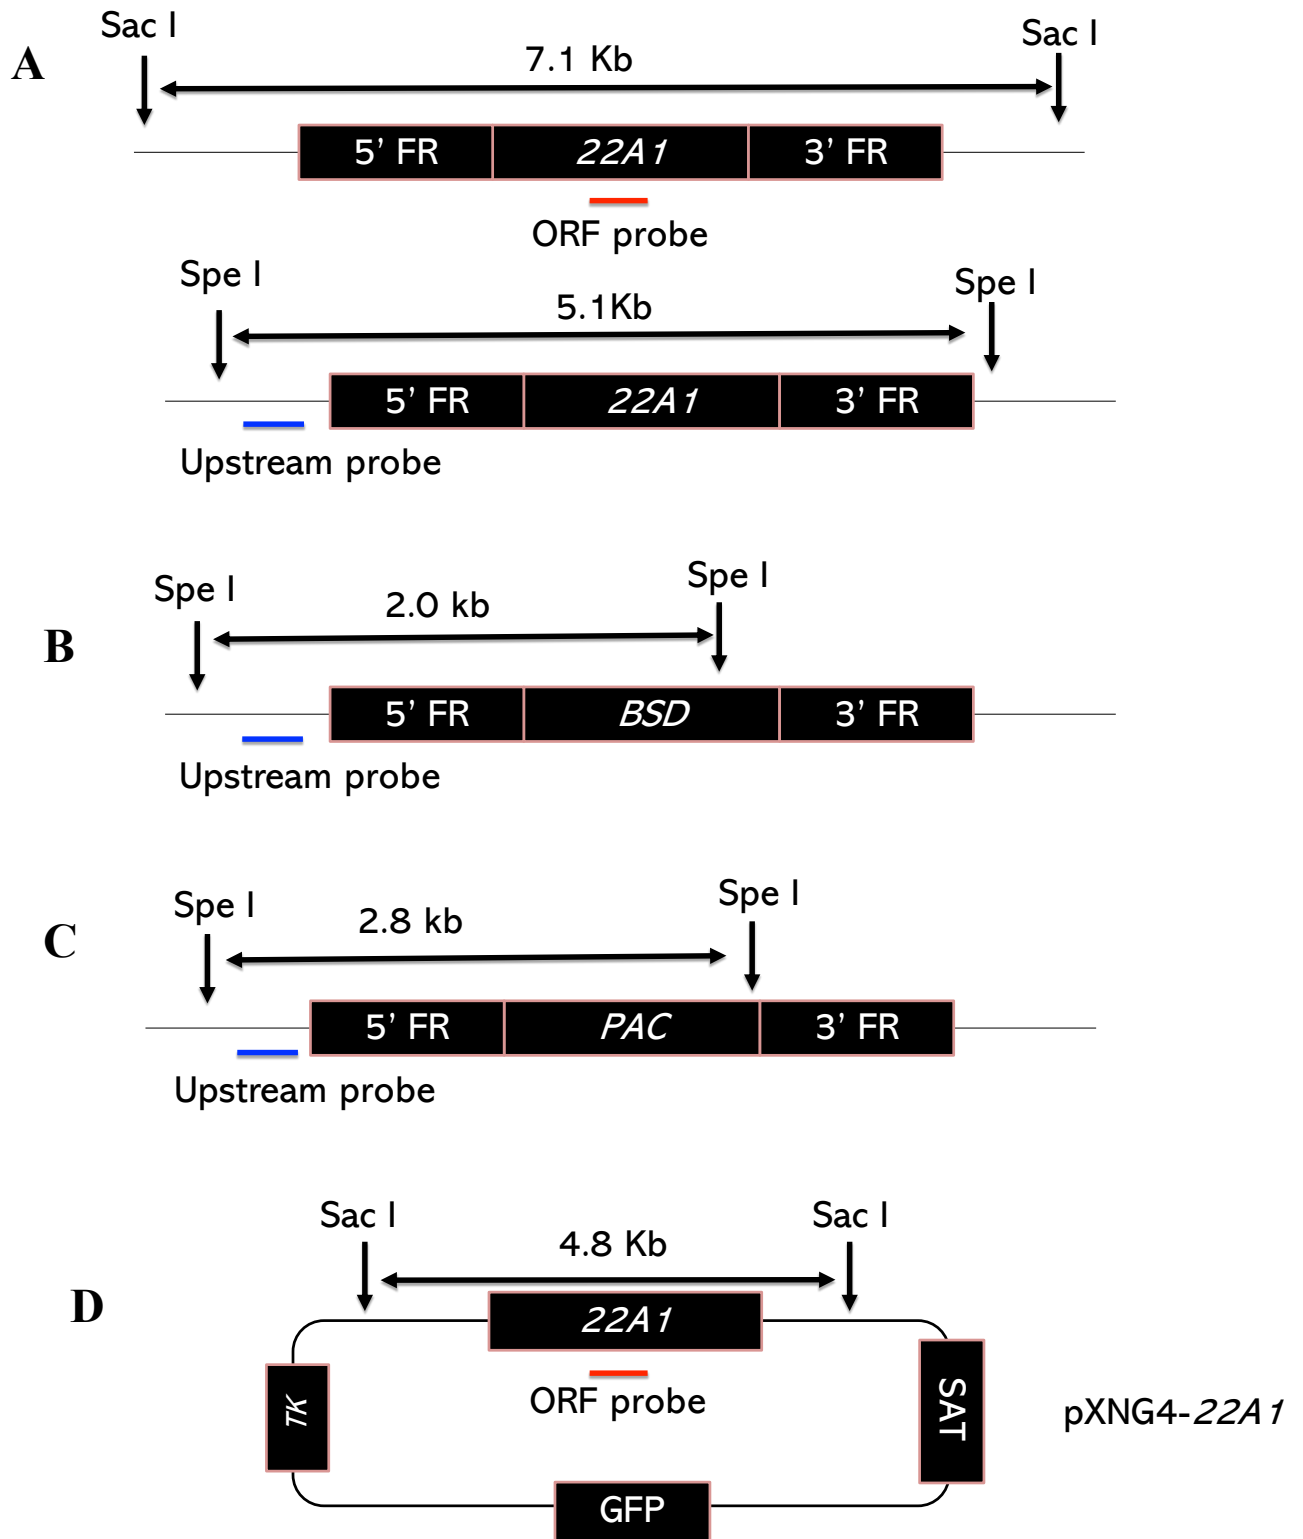

**Figure S4. Schematic depiction of the Southern blot for *L. major* CYP5122A1 (22A1).** (A) The genomic locus of CYP5122A1 in WT *L. major* along with its open reading frame (ORF), 5' and 3' flanking regions (FR), recognition sites of Sac I and Spe I, and the positions of ORF probe and upstream probe. (B-C) Replacement of 22A1 ORF with blasticidin (BSD) and puromycin (PAC) resistance genes. (D) Episomal expression of 22A1 from pXNG4-5122A1. TK: thymidine kinase, GFP: green fluorescent protein, SAT: nourseothricin resistance gene. The expected sizes of DNA fragments recognized by the ORF probe or upstream probe were indicated.

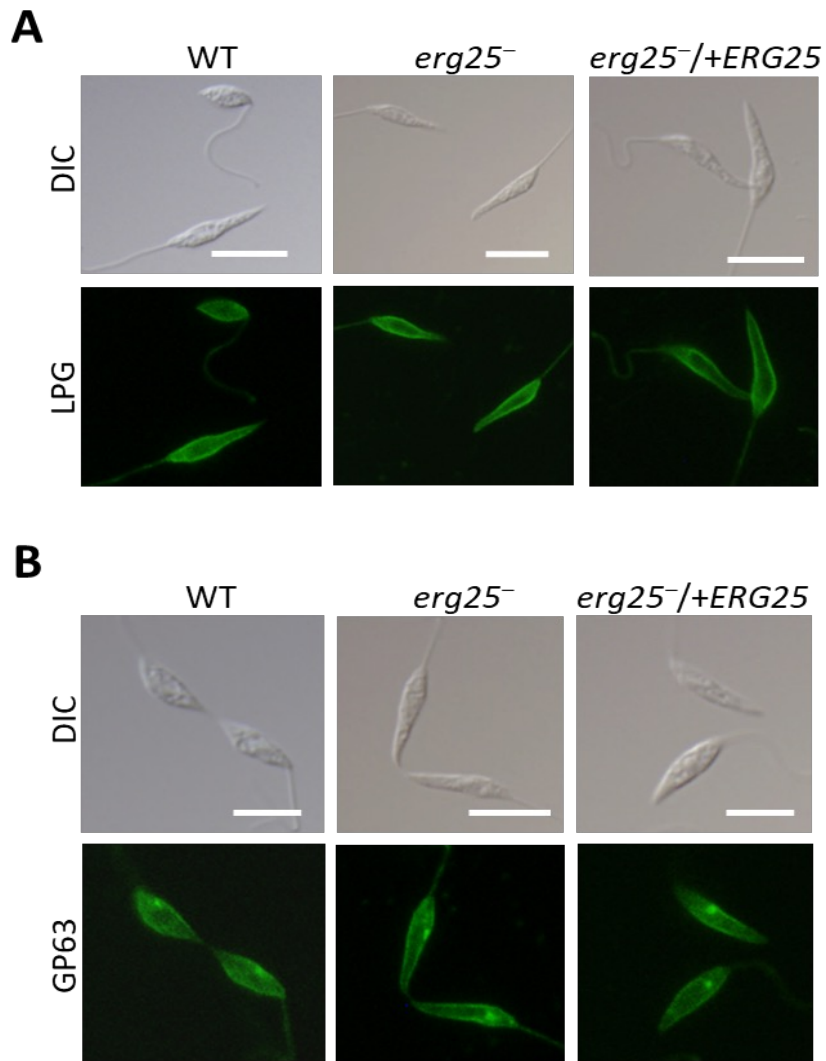

**Figure S5. The expression of LPG and GP63 is not affected in *erg25*<sup>-</sup> promastigotes.** Log phase promastigotes were labeled with mouse anti-LPG (A) or anti-GP63 (B) monoclonal antibody followed by goat anti-mouse IgG-FITC. Scale bars: 10  $\mu$ m.

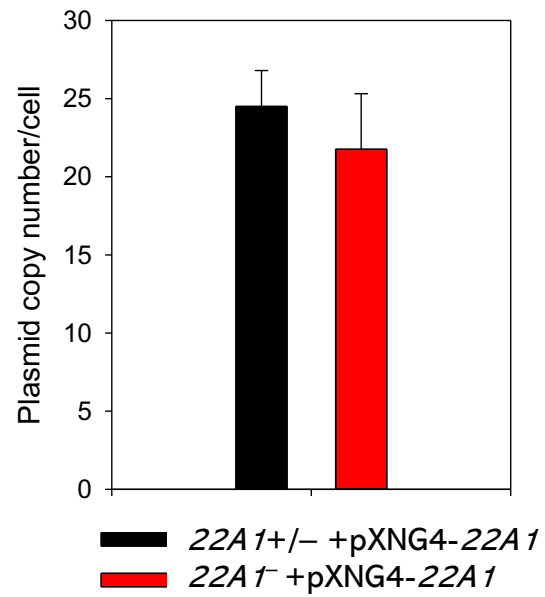

**Figure S6. Plasmid levels in promastigotes.** Stationary phase promastigotes of *22A1*<sup>+/-</sup> +pXNG4-*22A1* and *22A1*<sup>-</sup> +pXNG4-*22A1* were cultivated in the presence of SAT and their DNA was extracted to determine the average pXNG4-Lm22A1 plasmid copy numbers per cell by qPCR.

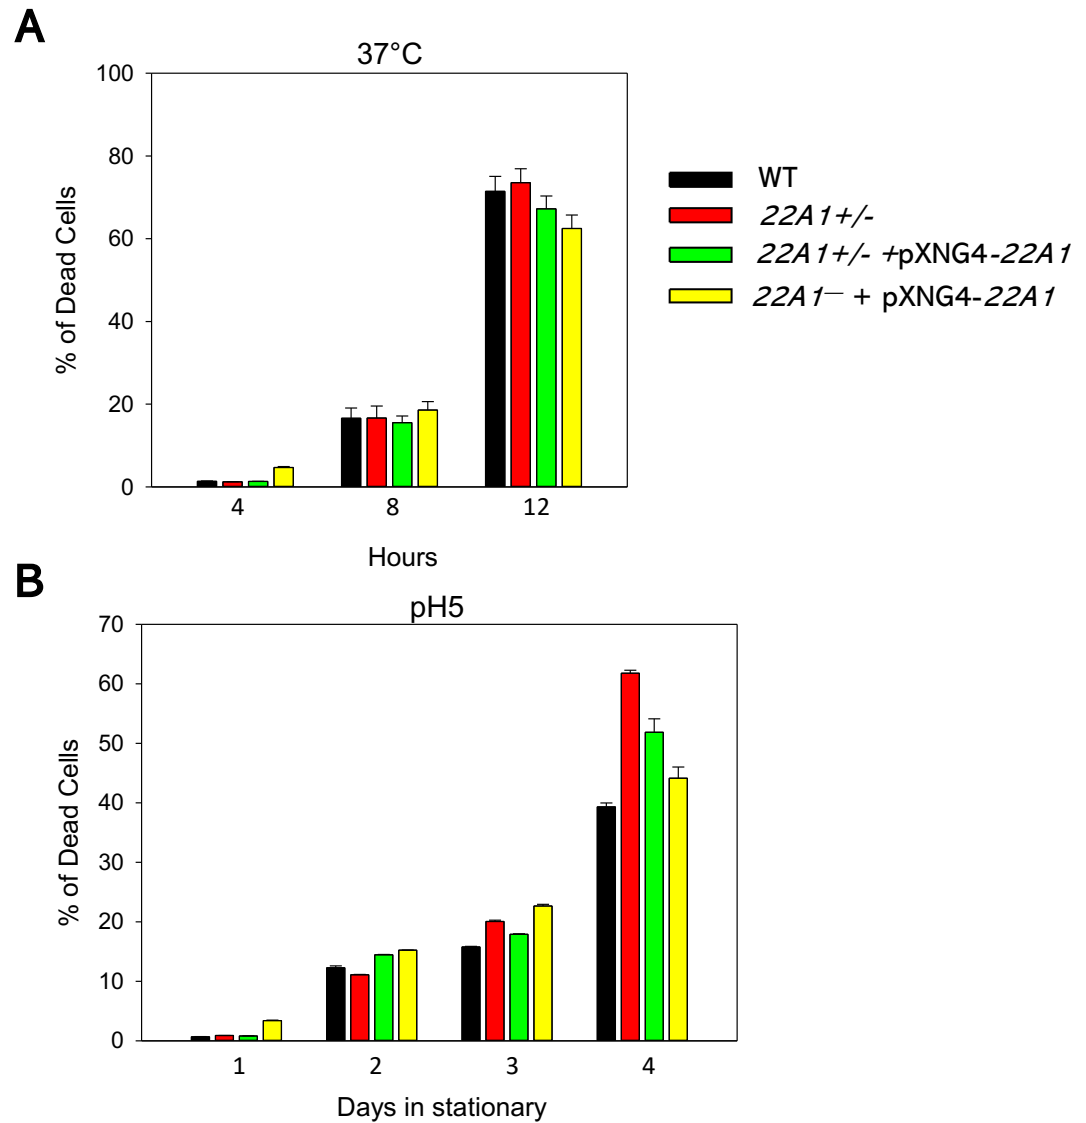

**Figure S7. Stress response of *22A1* mutants.** Day 1 stationary phase promastigotes were incubated under various conditions and percentages of dead cells were determined by flow cytometry at the indicated times. **A:** in complete M199, pH7.4, 37 °C. **B:** in complete M199, 27 °C, pH5.0. Error bars represent standard deviations from three experiments.

LV39 WT-119:05:5713-Aug-2019

20190813 sterol analysis\_014

MRM of 27 Channels AP+  
TIC  
7.00e6

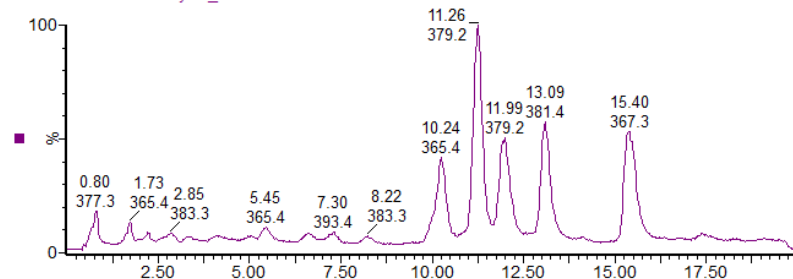

WT

20190813 sterol analysis\_017

MRM of 27 Channels AP+  
TIC  
6.21e6

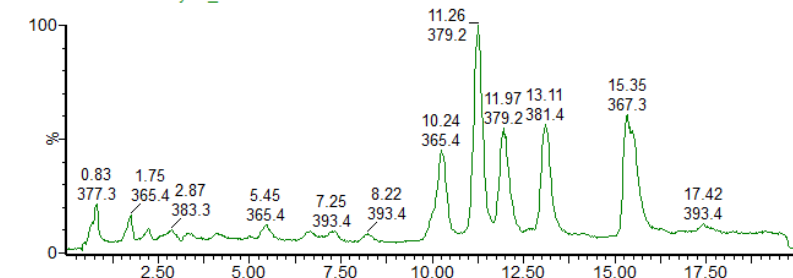

22A1+/- #4

20190813 sterol analysis\_020

MRM of 27 Channels AP+  
TIC  
6.07e6

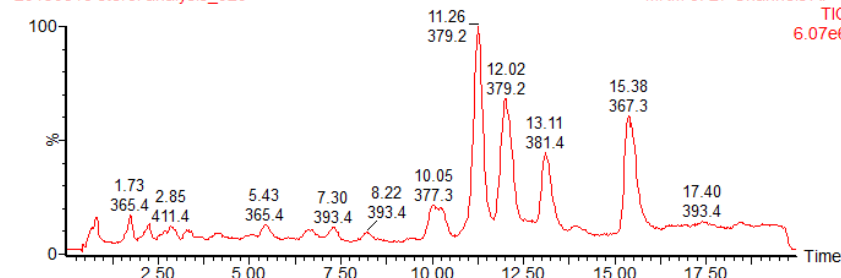

22A1+/- #4 +pXNG4-  
22A1

20190813 sterol analysis\_024

MRM of 27 Channels AP+  
TIC  
6.32e6

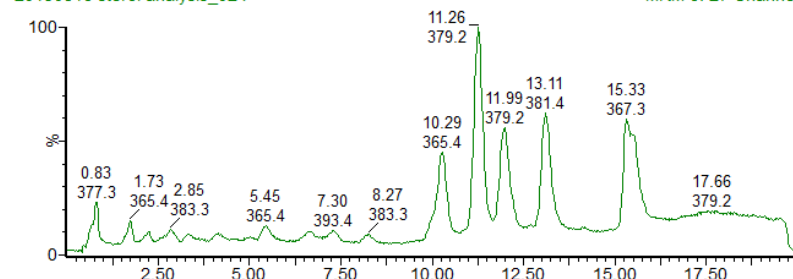

22A1+/- #5

20190813 sterol analysis\_027

MRM of 27 Channels AP+  
TIC  
7.06e6

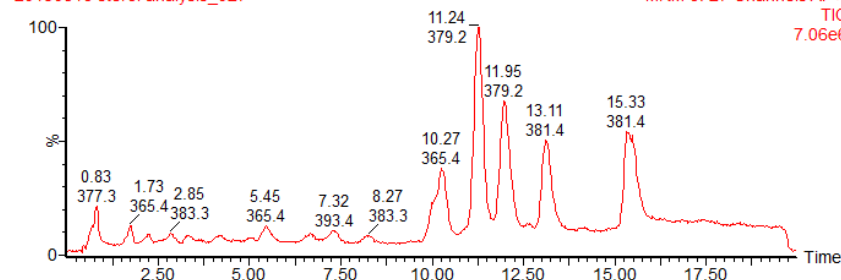

22A1+/- #5 +pXNG4-  
22A1

**Figure S8. 22A1 half knockout and overexpression do not affect bulk sterol composition in *L. major*.** Partial LC-MS chromatograms of free sterols from WT, 22A1+/- #4, 22A1+/- #4 +pXNG4-22A1, 22A1+/- #5, and 22A1+/- #5 +pXNG4-22A1 promastigotes.



**A**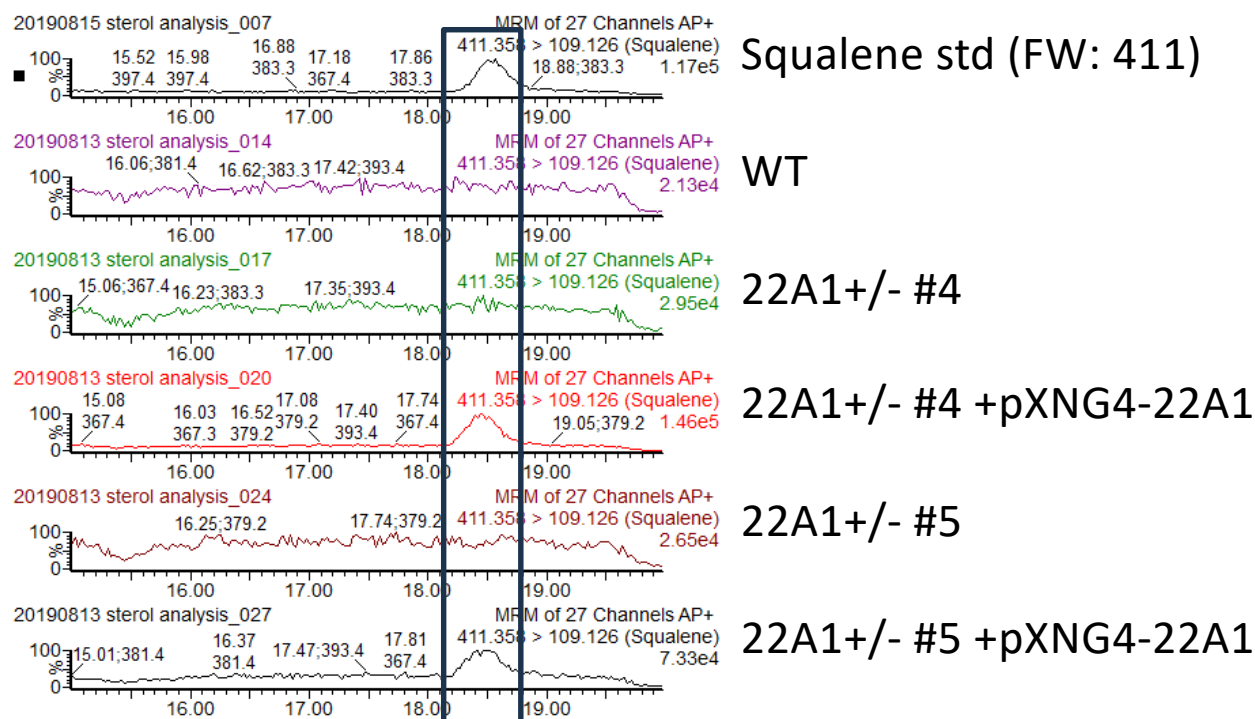**B**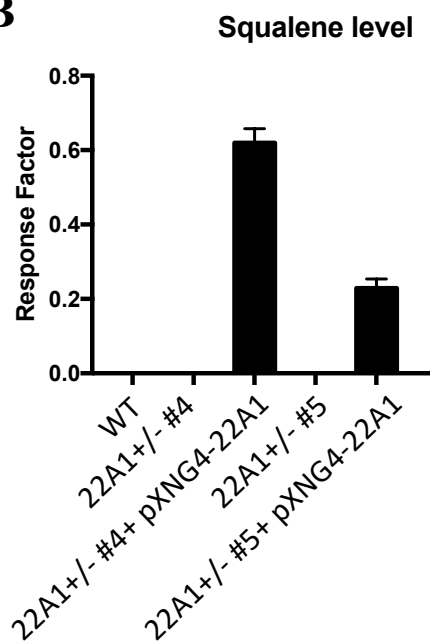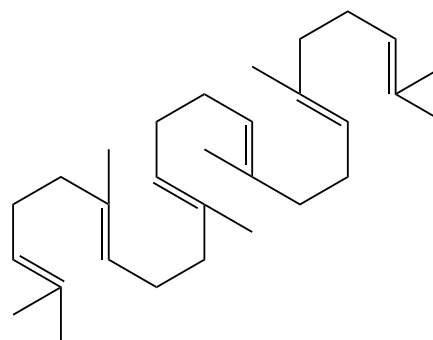

Squalene

**Figure S9. Squalene were detected in 22A1 overexpressing cells.** (A) Partial GC chromatograms of total lipids from WT, 22A1+/- #4, 22A1+/- #4 + pXNG4-22A1, 22A1+/- #5, and 22A1+/- #5 + pXNG4-22A1 promastigotes showed the presence of squalene in the boxed region. (B) The relative abundance of squalene was determined.

**Table S1. List of oligonucleotides used in this study**

| Oligo # | Name                         | Purpose                                                   | Sequence                                              |
|---------|------------------------------|-----------------------------------------------------------|-------------------------------------------------------|
| 709     | 28s rRNA_forward             | For qRT-PCR analysis of 28S rRNA                          | AAGATGGACCGGCTCTAGT                                   |
| 710     | 28s rRNA_reverse             | For qRT-PCR analysis of 28S rRNA                          | ATCCTTCCCCGCTCCAGTAT                                  |
| 359     | 5' ORF C4 methyl oxidase     | To amplify the ERG25 ORF                                  | GATCATagatct<br>TCGATGGTGCTCGCGAAAAAGC                |
| 360     | 3' ORF C4 methyl oxidase     | To amplify the ERG25 ORF                                  | GATCATagatct CCTTCACGAACACGCGCGC                      |
| 361     | for 5' UTR C4 methyl oxidase | To amplify the 5'- flanking sequence of ERG25             | GATCATgaattc<br>TCAATGTGACTTGCGTTTAACTCCCTCC          |
| 362     | rev 5' UTR C4 methyl oxidase | To amplify the 5'- flanking sequence of ERG25             | GTCAGCggatccGATCTAactagt<br>CGAGTGCCGAGGGATAAGGTGGAG  |
| 363     | for 3' UTR C4 methyl oxidase | To amplify the 3'- flanking sequence of ERG25             | GATCATggatcc<br>AGGTGCTCAGGCACAAAACGACTTC             |
| 364     | rev 3' UTR C4 methyl oxidase | To amplify the 3'- flanking sequence of ERG25             | GATCATaagett<br>TCAACAGTTATGCGCATACATATTCACAG         |
| 602     | Erg25_probe_F.P              | To generate the ERG25 probe for Southern blot             | GCGCACACCTTCAATGTG                                    |
| 603     | Erg25_probe_R.P              | To generate the ERG25 probe for Southern blot             | CGAACACGACGTGTA                                       |
| 631     | Erg25 probe out of 5'UTR F   | To generate the ERG25 probe for Southern blot             | CAGAGCTAAGTCGTGCTG                                    |
| 632     | Erg25 probe out of 5'UTR R   | To generate the ERG25 probe for Southern blot             | GCTGTTCTGCGGATCATC                                    |
| 740     | LmCYP-5'UTR-R                | To amplify the 5'- flanking sequence of Lm22A1            | GTC GCT actagt GTG AAA TGG GCG ACA AGA G              |
| 757     | LmCYP-5'UTR-F                | To amplify the 5'- flanking sequence of Lm22A1            | CAT GCT gaattc CCT TTC TCT GTG CAC CCT TC             |
| 741     | LmCYP-3'UTR-F                | To amplify the 3'- flanking sequence of Lm22A1            | CGG ACG actagt GGC TAG agatct AGC GAG CTG AGA ATT GCC |
| 742     | LmCYP-3'UTR-R                | To amplify the 3'- flanking sequence of Lm22A1            | GTC AAG aagett GCA TTC ACG CAC GCT CTC                |
| 754     | LmCYPORF-F                   | To amplify the Lm22A1 ORF                                 | TCA GTA ggatcc ACC ATG GTG TTT GAC ACC GAC            |
| 755     | LmCYPORF-R                   | To amplify the Lm22A1 ORF                                 | GCG CT ggatcc TTACATGAACAACCTTGTTTCG                  |
| 756     | LmCYPORF-nostop-R            | To amplify the Lm22A1-GFP fusion                          | GCG GTC gatatc CAT GAA CAA CTT GTT CGG                |
| 768     | Lm22A1 ORF probe FP          | To generate the Lm22A1 and Ld22A1 probe for Southern blot | GTC GCA TGC GAT GCG CAT C                             |
| 769     | Lm22A1 ORF probe RP          | To generate the Lm22A1 and Ld22A1 probe for Southern blot | GTA GCG AGT CTG CAC GGT GC                            |
| 770     | Lm22A1 5'UTR probe FP        | To generate the Lm22A1 probe for Southern blot            | CAG TGA GCG AGA GAA CGA G                             |
| 771     | Lm22A1 5'UTR probe RP        | To generate the Lm22A1 probe for Southern blot            | CCT ACA TGA GCG TAG GAC AC                            |
